# Supplementary material for: Functional Differences of Grapevine Circular RNA Vv-circPTCD1 in Arabidopsis and Grapevine Callus under Abiotic Stress
Source: MDPI journal article supplement (doi:10.3390/plants12122332), 2023-06-15
Supplement: s1 [file s1]

# Supplementary files

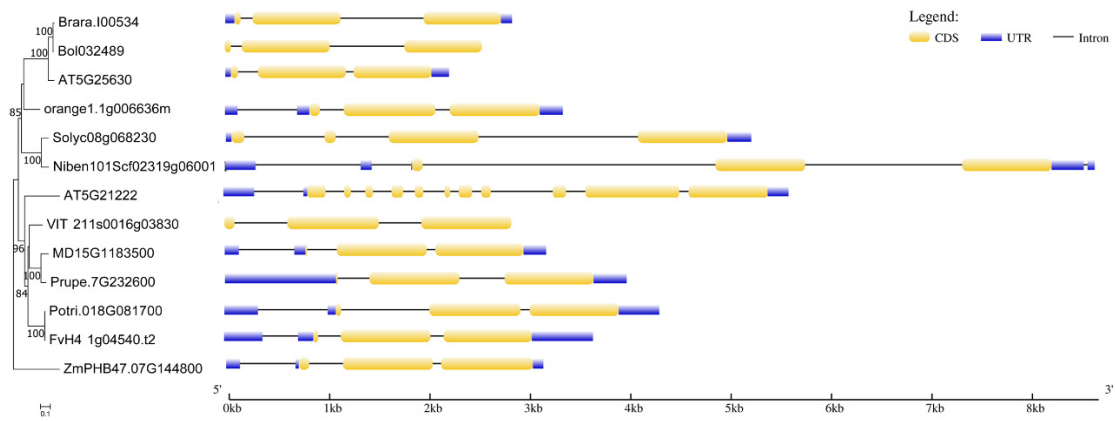

**Figure S1.** the physical gene structure of *PTC1* (VIT\_211s0016g03830) orthologs in plants. The *PTC1* orthologs were collected from *Brassica rapa* (Brara.I00534), *Brassica oleracea* (Bol032489), *Arabidopsis thaliana* (AT5G25630 and AT5G21222), *Citrus sinensis* (orange1.1g006636m), *Solanum lycopersicum* (Solyc08g068230), *Nicotiana benthamiana* (Niben101Scf02319g06001), *Malus domestica* (MD15G1183500), *Prunus persica* (Prupe.7G232600), *Populus trichocarpa* (Potri.018G081700), *Fragaria vesca* (FvH4\_1g04540.t2), *Zea mays* (ZmPHB47.07G144800). The gene structure was generated by the GSDS 2.0 web tools [60].

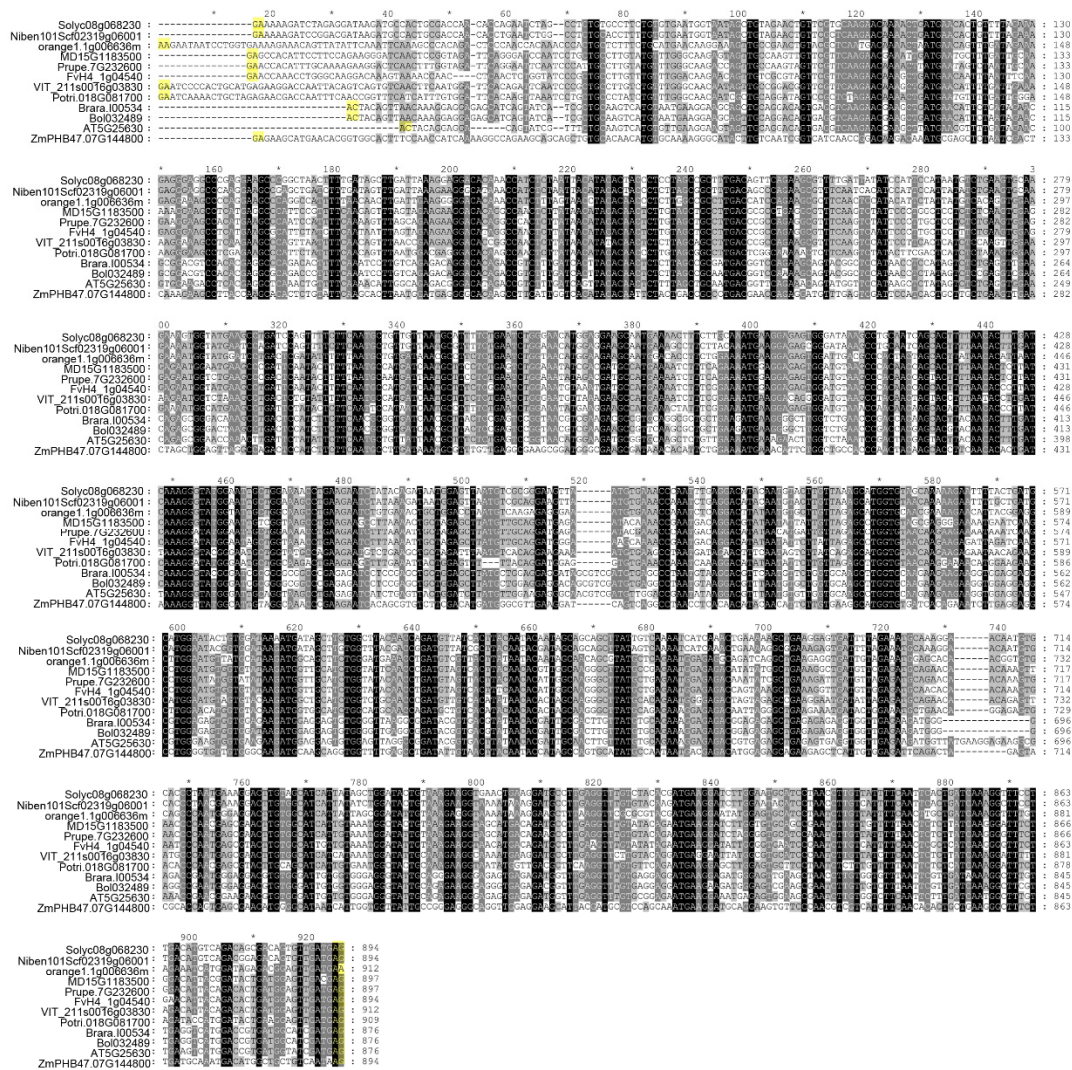

**Figure S2.** the multiple sequence alignment of the second exon of *PTCD1* orthologs. The accession number of each gene was listed in Figure S1, and the sequence alignment was conducted by Clus-talW (<https://www.genome.jp/tools-bin/clustalw>). The yellow background was the splicing site of exon edge.

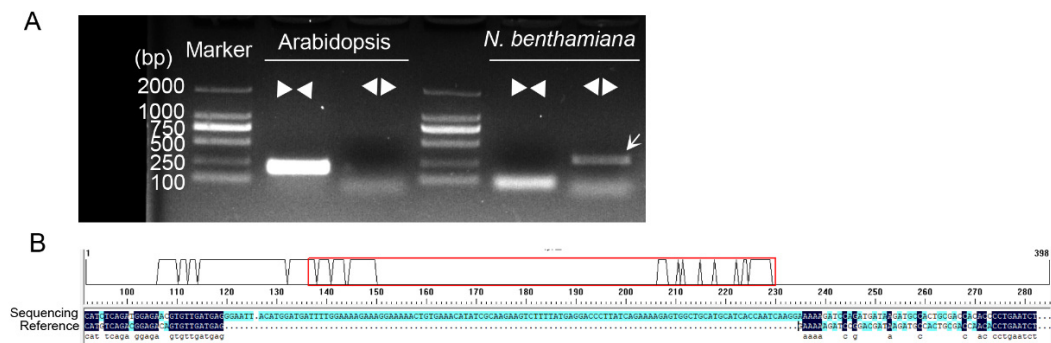

**Figure S3.** PCR detection of putative *Vv-circPTCD1* ortholog candidates in *Arabidopsis* and *N. benthamiana* (A). The gel electrophoresis imaging of PCR results; (B) Sequence alignment between reference and PCR product derived from *N. benthamiana*. The arrow indicated the non-specific amplification, “D” indicated the convergent primer pairs, “C” indicated the divergent primer pairs.

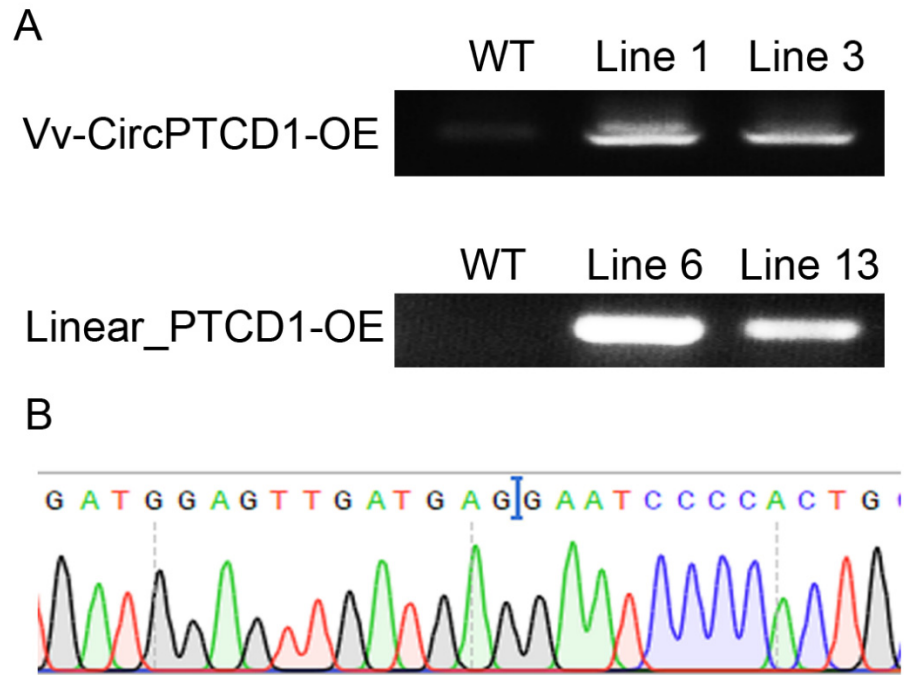

**Figure S4.** verification of *Vv-circPTCD1* and Linear\_PTCD1 OE lines in *Arabidopsis*. (A) The gel electrophoresis of PCR amplification; (B) confirmation of back-splicing site of *Vv-circPTCD1* in ectopic OE lines.

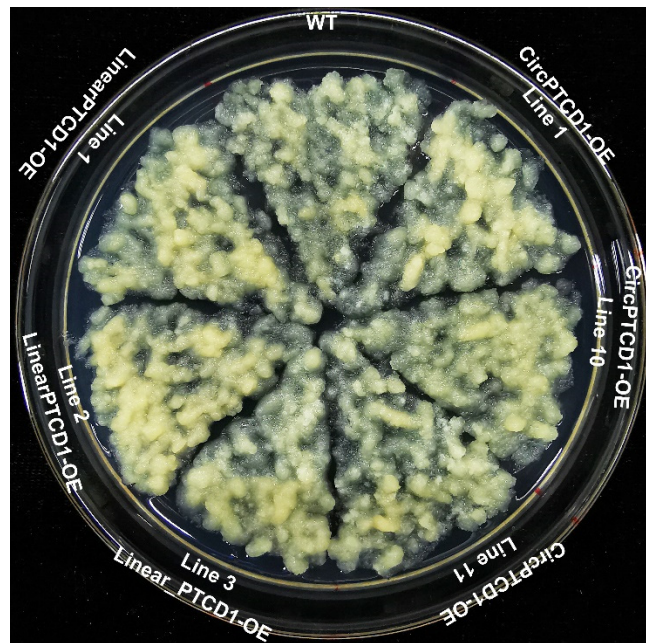

**Figure S5.** the phenotype of callus incubated in normal condition. The overexpressed callus mass and WT were incubated at 26°C on the dark and the phenotypic difference was undetectable.
